# Supplementary material for: Microphysical properties of various precipitation systems worldwide classified via objective methods based on dual-frequency precipitation radar observations
Source: Copernicus journal article supplement (doi:10.5194/egusphere-2025-2199), 2025-07-10
Supplement: Supplementary file 1 [file egusphere-2025-2199-supplement.pdf]

## Media

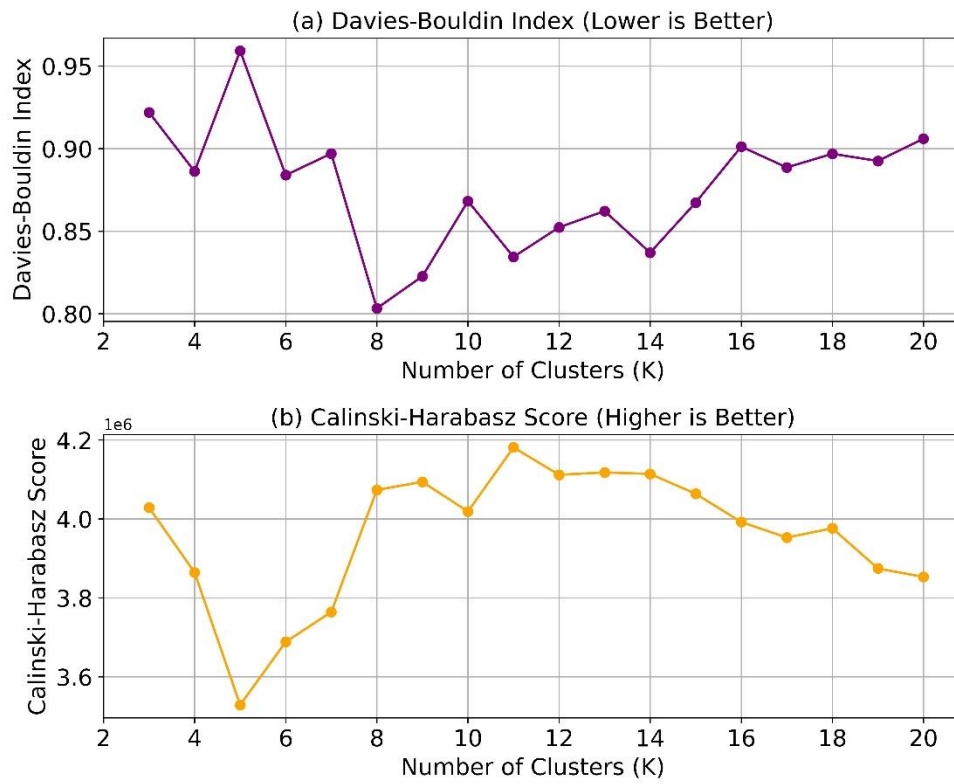

**Fig. S1.** Changes in DB index and CH score with the number of clusters from 2 to 20.

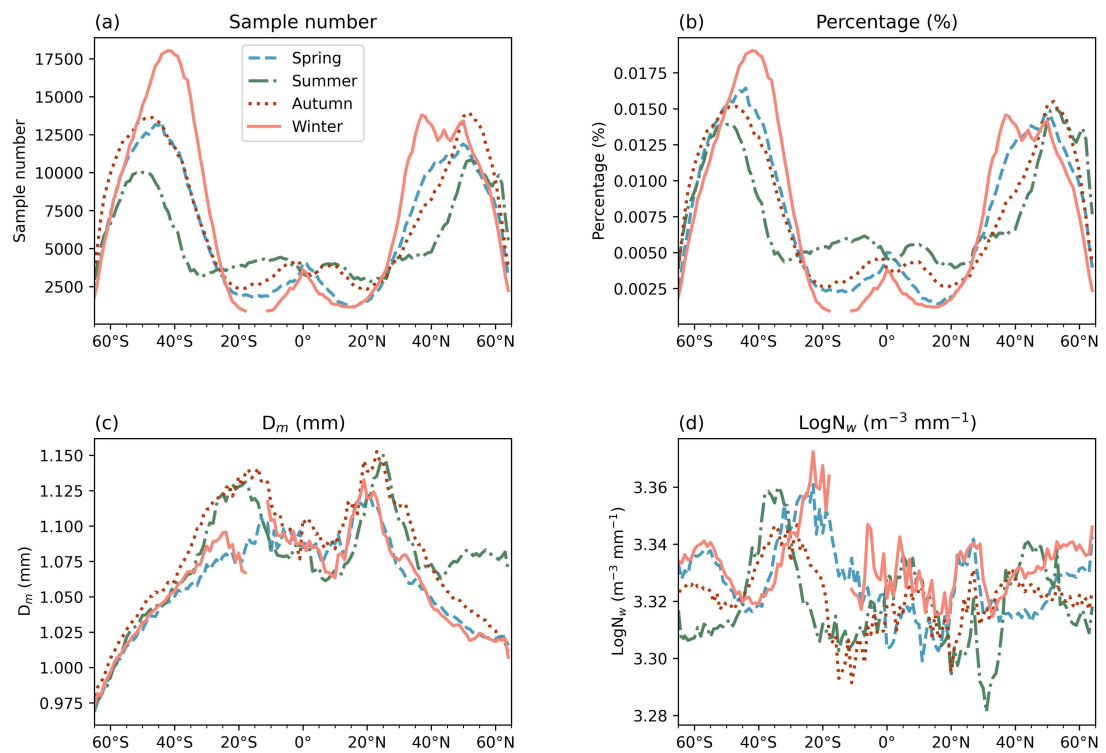

**Fig. S2.** Changes in (a) the number of samples, (b) percentage of precipitation systems reaching 2.5 km in echo top height, (c) the mass-weighted mean diameter ( $D_m$ ), and (d) the normalized intercept parameter ( $N_w$ ) with latitude for High-latitude shallow PS. (Latitudes will be excluded if their sample size does not reach 0.002 of the total sample sizes.)

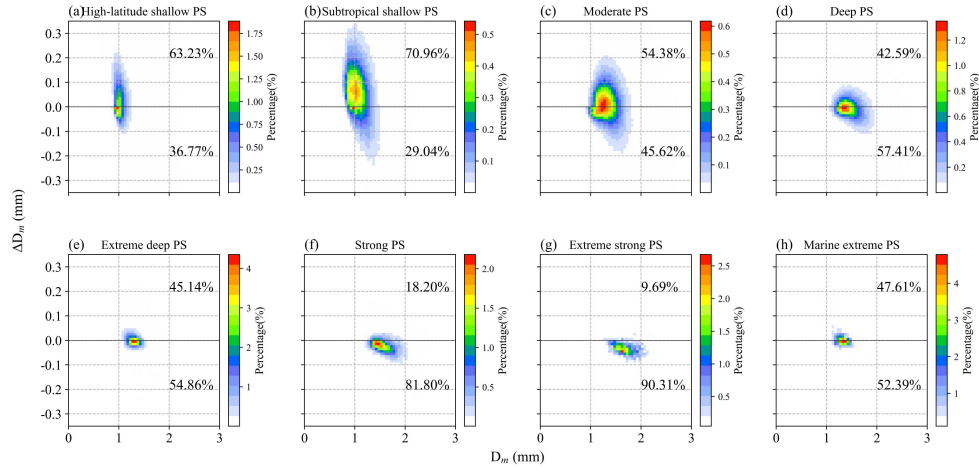

**Fig. S3.** Two-dimensional probability density functions of  $D_m$  at 3 km and  $\Delta D_m$  between 2 km and 3 km for the different PSs.
